1 **Transposable elements generate regulatory novelty in a tissue**  
2 **specific fashion**

3  
4 Marco Trizzino<sup>1,2,\*</sup>, Aurélie Kapusta<sup>3,4</sup> and Christopher D. Brown<sup>2,5,\*</sup>  
5  
6

7 <sup>1</sup>Gene Expression and Regulation Program, The Wistar Institute, Philadelphia, PA, USA  
8

9 <sup>2</sup>Department of Genetics, University of Pennsylvania, Philadelphia, PA, USA  
10

11 <sup>3</sup>Department of Human Genetics, University of Utah, Salt Lake City, UT, USA  
12

13 <sup>4</sup>USTAR, Center for Genetic Discovery, Salt Lake City, UT, USA  
14

15 <sup>5</sup>Institute for Biomedical Informatics, University of Pennsylvania, Philadelphia, PA, USA  
16

17 \*Correspondence: M.T. (marco.trizzino83@gmail.com), and C.D.B (chrbro@upenn.edu)  
18  
19  
20  
21  
22  
23  
24  
25  
26  
27  
28  
29  
30  
31  
32  
33  
34  
35  
36  
37  
38  
39  
40  
41  
42

43  
44  
45  
46  
47  
48  
49  
50  
51  
52  
53  
54  
55  
56  
57  
58  
59  
60  
61  
62  
63  
64  
65  
66  
67  
68  
69  
70  
71  
72  
73  
74  
75  
76  
77

## Abstract

Transposable elements (TE) are an important source of evolutionary novelty in gene regulation. However, the mechanisms by which TEs contribute to gene expression are largely uncharacterized. Here, we leverage Roadmap and GTEx data to investigate the dynamics of TE recruitment in 24 tissues. We find 112 human TE types enriched in active regions of the genome across tissues. SINEs and DNA transposons are the most frequently enriched classes, while LTRs are often co-opted in a tissue specific manner. We report across-tissue variability in TE enrichment in active regions. Genes with consistent expression across tissues are less likely to be associated to TE insertions. TE repression similarly follows tissue specific patterns, and LTRs are the most abundant class in repressed regions. Different TE classes are preferentially silenced in different ways: LTRs and LINEs are overrepresented in regions marked by H3K9me3, while other TEs are preferentially repressed by H3K27me3. Young TEs are typically enriched in repressed regions and depleted in active regions. We detect multiple instances of TEs with tissue specific regulatory activity. Such TEs provide binding sites for transcription factors that are master regulators for the given tissue. These tissue specific activated TEs are enriched in intronic enhancers, and significantly affect the expression of the associated genes. Finally we show that SVAs can act as transcriptional activators or repressors in a tissue specific context. We provide an integrated overview of the contribution of TEs to human gene regulation. Expanding previous analyses, we demonstrate that TEs generate regulatory novelty in a tissue specific fashion.

**Keywords:** Transposons, gene regulation, tissue specific, transcription factors

## 78 **Introduction**

79 Transposable elements (TEs) contribute to roughly half of the human genome.  
80 Several TE groups maintain transposing activity in humans, including Long Terminal  
81 Repeats (LTRs, mostly ERV1s; Tonjes et al. 1996; Medstrand et al. 1998; Fuchs et  
82 al. 2013), Long Interspersed Nuclear Elements (LINEs, mostly L1s; Kazazian et al.  
83 1998; Brouha et al. 2003), Short Interspersed Nuclear Elements (SINEs) of the Alu  
84 families (Batzer and Deininger 1991; Batzer et al. 1991), and SINE-VNTR-*Alus*  
85 (SVAs; Ostertag et al. 2003; Wang et al. 2005).

86 Multiple elegant studies have demonstrated that TEs play a functional role in  
87 eukaryotic gene regulation (McClintock 1950, 1984; Britten and Davidson 1969;  
88 Davidson and Britten 1979; Jordan et al. 2003; Bejerano et al. 2006; Wang et al.  
89 2007; Bourque et al. 2008; Sasaki et al. 2008; Markljung et al. 2009; Kunarso et al.  
90 2010; Lynch et al. 2011, 2015; Schmidt et al. 2012; Chuong et al. 2013, 2016;  
91 Jacques et al. 2013; Xie et al. 2013; del Rosario et al. 2014; Sundaram et al. 2014;  
92 Du et al. 2016; Rayan et al. 2016). Consistently, we recently demonstrated that TEs  
93 are the primary source of evolutionary novelty in primate gene regulation, and  
94 reported that the large majority of newly evolved human and ape specific liver cis-  
95 regulatory elements are derived from TE insertions (Trizzino et al. 2017). Similarly,  
96 other studies have shown that the recruitment of novel regulatory networks in the  
97 uterus was likely mediated by ancient mammalian TEs (Lynch et al. 2011, 2015),  
98 and that TEs have a role in pluripotency (Macfarlan et al. 2012). Conversely, other  
99 researchers have proposed that TE exaptation into regulatory regions is rare  
100 (Simonti et al. 2017), and that TE silencing may not be a major driver of regulatory  
101 evolution in primates (Ward et al. 2017).

102           Given these contrasting lines of evidence, we aimed to shed light on the  
103 contribution of TEs to the evolution of tissue specific human gene expression  
104 regulation. For this purpose, we took advantage of publicly available data (Roadmap  
105 Epigenomics Mapping Consortium 2015; GTEx Consortium 2017) to investigate the  
106 dynamics of TE recruitment in 24 tissues, and to characterize the contribution of TEs  
107 to the regulation of gene expression. A significant fraction of the existing human TEs  
108 are enriched in regions of the genome bearing hallmarks of active or repressed  
109 chromatin, suggesting they are actively regulated by the cellular machinery. DNA  
110 transposons and SINEs represent the most frequently enriched classes across  
111 tissues, while LTR-ERV1s are the TEs that more commonly show tissue specific  
112 enrichment and active regulatory activity. TE enrichment in active and repressed  
113 chromatin exhibits tissue specific patterns. Genes with consistent expression across  
114 tissues are less likely to be associated with a local TE insertion, further supporting  
115 the role of TEs in mediating tissue specific regulatory programs. We detect multiple  
116 instances of TEs with tissue specific activity, and demonstrate that they provide  
117 binding sites for transcription factors that are tissue specific master regulators.

118

## 119 **Results**

### 120 **Specific TE families are enriched in active and repressed genomic regions**

121 To investigate the extent to which TEs contribute to the regulation of human gene  
122 expression, we leveraged publicly available data from the Roadmap Epigenomics  
123 Project (2015) and from the GTEx Project (2017). We focused on 24 primary tissues  
124 and cell types that were processed by both consortia (Supplementary Table S1).  
125 Using five different histone modifications (H3K4me1, H3K4me3, H3K36me3,  
126 H3K9me3, and H3K27me3), Roadmap segmented the human genome into 15

127 regulatory classes, reflecting different degrees and types of regulatory activity. We  
128 took advantage of this classification to define active and repressed genomic regions  
129 in each of the studied tissues.

130 To test for TE enrichment in active and repressed regions, we used the TE-  
131 Analysis pipeline (Kapusta et al. 2013; <https://github.com/4ureliek/TEanalysis>;  
132 Supplemental File S1). As expected, the majority of human TEs are significantly  
133 depleted from regions marked as active from the Roadmap histone modifications  
134 (mean 83.9% of TEs; FDR <5%; Supplementary Table S2). Nevertheless, 112 TE  
135 families (9.07% of the annotated TE families in the human genome) are significantly  
136 enriched in active regions of the genome in at least one tissue (FDR <5%; Fig. 1a;  
137 Supplementary Table S2). These data suggest variability across tissues: aorta,  
138 brain anterior caudate, and adipose are the most “permissive” tissues, while right  
139 atrium and spleen do not show any significant TE enrichment in active regions (Fig.  
140 1a).

141 SINEs and “cut and paste” DNA transposons are the classes most frequently  
142 enriched in active chromatin (Fig. 1b). SINE families, the most abundant human TEs  
143 (38.8% of the total), correspond to 43–66% of the TEs enriched in active regions  
144 (FDR < 5%), these fractions being more than expected by chance in all tissues  
145 (Proportion Test  $p < 2.2 \times 10^{-16}$  for each tested tissue). Similarly, DNA TEs, that  
146 account for 11.3% of the annotated TEs, represent 29–47% of the transposons  
147 enriched in active regions (Proportion Test  $p < 2.2 \times 10^{-16}$  for each tested tissue). In  
148 general, SINE-Alu elements are the most commonly enriched TEs (Supplementary  
149 Table S2).

150 Conversely, LTRs and LINEs are significantly depleted from active genomic  
151 regions of all tissues (Proportion Test  $p < 2.2 \times 10^{-16}$  for each tested tissue; Fig. 1b).

152 Finally, SINE-VNTR-*Alus* (SVAs), which are the least abundant TEs in the human  
153 genome (0.12% of the total annotated TEs in the human genome), are significantly  
154 overrepresented in active chromatin in 13/24 tissues; Fig. 1b).

155 We set out to investigate the TEs overlapping active regions. These TEs are  
156 depleted in active promoters and intergenic regions, but significantly enriched within  
157 active regions inside gene bodies (Fisher's Exact Test *p-values* in Fig. 1c). A  
158 possible interpretation for these results could be that genomic regions containing  
159 active genes are more frequently accessible, providing a substrate for TEs to insert.  
160 Moreover, we speculate that the TEs present in the bodies of active genes are less  
161 likely to be silenced than TEs in intergenic regions.

162 Using the same approach previously described for the active regions, we  
163 searched for TEs enriched in repressed genomic regions. Overall, 314 human TE  
164 families (25.4%) are significantly enriched in repressed regions of the genome in at  
165 least one tissue (FDR <5%; Fig. 2a; Supplementary Table S3). LTRs (predominantly  
166 ERV1) represent the large majority of the repressed TEs (Fig. 2b), followed by LINEs  
167 (predominantly L1s) and DNA TEs. Notably, ERV LTRs and L1 LINEs are among  
168 the most active in the genome, and also have their own regulatory architecture  
169 (Klaver et al. 1994; Lavie et al. 2004). We thus surmise that these autonomous  
170 active TEs are preferential targets of repressive marks.

171 We note a very high variability in the number of repressed TE families across  
172 tissues (Fig. 2a), as well as large differences in the composition of enriched TE  
173 classes in the repressed regions. Interestingly, the tissues that harbor the highest  
174 number of TE families enriched in repressed regions (pancreas, aorta, lung, spleen,  
175 esophagus, breast, and liver; Fig. 2a) are also those displaying the highest numbers  
176 of enriched LINEs in the same repressed regions (Fig. 2b).

177

## 178 **Different TE repression patterns in the human genome**

179 We examined whether TEs are preferentially repressed via Polycomb Repressive  
180 Complex (H3K27me3) or via Heterochromatin (H3K9me3). Overall, 78.6% of the  
181 regions classified as repressed in the human genome across all tissues are bound  
182 by H3K27me3 (Polycomb Repressive Complex), while 21.4% are marked by  
183 H3K9me3 (Heterochromatin conformation). However, when we restrict the analysis  
184 to the repressed regions containing a TE, we report an overall higher than expected  
185 overlap with H3K27me3 (median across tissues 85.5%; Proportion Test across  
186 tissues  $p < 2.2 \times 10^{-16}$ ; Supplementary Table S4; Fig. 2C), and a consequent  
187 underrepresentation of H3K9me3 (median 15.5%; Supplementary Table S4;  
188 Proportion Test  $p < 2.2 \times 10^{-16}$ ; Fig. 2d). In 20/24 of the tested tissues, TEs are  
189 marked by H3K27me3 more than expected by chance (Proportion Test  $p < 2.2 \times 10^{-16}$   
190 for each of the 20 significant tissues; Supplementary Table S4). In the remaining  
191 four tissues this histone mark is instead underrepresented, while H3K9me3 is  
192 overrepresented: breast (H3K27me3 = 76.4%; Supplementary Table S4; Proportion  
193 Test  $p < 2.2 \times 10^{-16}$ ), aorta (55.1%; Supplementary Table S3;  $p < 2.2 \times 10^{-16}$ ), lung  
194 (48.9%; Supplementary Table S4;  $p < 2.2 \times 10^{-16}$ ), and spleen (26.5%;  
195 Supplementary Table S3;  $p < 2.2 \times 10^{-16}$ ). Notably, in these four tissues we detect  
196 the highest numbers of TE families enriched in repressed regions (Fig. 2a), and the  
197 highest proportion of repressed LINEs. This suggests that the heterochromatin state  
198 (H3K9me3) may be employed to target specific TE classes and families in a context  
199 specific manner (Ward et al. 2017).

200 We therefore tested whether different TE classes are preferentially repressed  
201 by heterochromatic configuration (H3K9me3) or by Polycomb (H3K27me3). LTRs,

202 LINEs, and SVAs are overrepresented in regions marked by H3K9me3 (Fisher's  
203 Exact Test  $p < 2.2 \times 10^{-16}$  ; Fig. 2d). Conversely, SINEs and DNA TEs are  
204 preferentially repressed by H3K27me3. Notably, SVAs are depleted from the  
205 regions marked by H3K27me3 (Fig. 2d).

206 These findings are consistent with recent reports suggesting that H3K27me3  
207 and H3K9me3 target different transposon types in embryonic stem cells (Walter et  
208 al. 2016), and with a study reporting that LINEs, LTRs, and SVAs are the most  
209 abundant TEs repressed by H3K9me3 in induced pluripotent stem cells (Ward et al.  
210 2017).

211

## 212 **Ancient TEs are enriched in active regions, while young TEs are repressed**

213 We clustered the annotated human TEs in 35 age classes as in ref. (Kapusta et al  
214 2013; e.g. Eutheria, Primates, Hominidae; Supplemental Table S6), and used the  
215 TE-Analysis shuffling script to test for enrichment of each age class in a given set of  
216 regions (see Methods). Using this approach, we assessed the age of TEs enriched  
217 in active and repressed genomic regions. Ancient TE classes (i.e. age classes older  
218 than the Eutheria lineage) are enriched in the active regions of all tested tissues  
219 (FDR <5%; Supplemental Table S6). These TEs are largely vertebrate or  
220 mammalian specific (Supplemental Table S6). Notably, the only tissues with an  
221 enrichment of young TEs (specifically primate specific) are blood related  
222 (Mononuclear and Lymphoblastoid Cells). These results are in agreement with an  
223 elegant study that discovered a key role of primate specific TEs in the regulatory  
224 evolution of immune response (Chuong et al. 2016). TE families enriched in active  
225 regions across at least 20 of the 24 tissues correspond to DNA TEs and SINEs



226 (Supplemental Table S2). Despite a lack of general enrichment of young TEs in  
227 active regions, 24 *Alu* families are in fact enriched in active regions.

228 In contrast, young TEs (i.e. TE classes younger than the Eutheria lineage  
229 split) are significantly enriched in the repressed regions of most tissues. In particular  
230 human specific TEs are enriched in the repressed regions of all brain related tissues  
231 (FDR <5%; Supplemental Table S6). These young TEs correspond to ERV LTRs, L1  
232 LINEs and SVAs, but only one family is found enriched in at least 20 tissues  
233 (MER52A), which is in line with the large variability across tissues of the TE  
234 composition of repressed regions (see above). Collectively, these data suggest that  
235 young TEs are predominantly silenced, while older TEs are now more tolerated.

236

### 237 **TE insertions are associated with gene expression variance across tissues**

238 We used GTEx data to test if TE insertions affected local gene expression. For this  
239 purpose, we first assigned each TE overlapping an active genomic region to its  
240 nearest gene transcription start site (TSS). Next, we divided all human genes in four  
241 categories (Supplemental Table S7): 1) Genes associated with TEs that are only  
242 found in active regions across tissues; 2) Genes associated with TEs that are found  
243 in active or repressed regions in a tissue specific fashion; 3) Genes associated with  
244 TEs that are only found in repressed regions; 4) Genes never associated with TE  
245 insertions. Based on this classification, genes associated with a TE insertion in  
246 regions that are active in at least one tissue are characterized by significantly higher  
247 expression variance (normalized by mean expression) than genes either associated  
248 to repressed TEs or not associated to a TE (Wilcoxon's Rank Sum Test  $p < 2.2 \times 10^{-16}$ ;  
249 Fig. 3). On the other hand, we do not detect significant differences when  
250 comparing genes associated to TEs only present in active regions, to genes with

251 TEs present in both active and repressed regions (Wilcoxon's Rank Sum Test  $p >$   
252 0.05; Fig. 3).

253 These findings suggest that genes with local TEs overlapping active  
254 chromatin have higher variability in gene expression across tissues, and that genes  
255 consistently expressed across tissues (e.g. housekeeping and other essential genes)  
256 may be less tolerant towards TE insertions in their regulatory regions.

257

### 258 **Tissue specific activity of TEs**

259 We next investigated whether specific TE families display differential activity across  
260 tissues. We compared the relative enrichment in active regions of each TE family  
261 across tissues (see methods). TE enrichment varies substantially across tissues  
262 (Supplemental Table S5; Fig. 4), and many TEs exhibit tissue specific activity (Fig.  
263 4). For example, HERV15 (LTR) is significantly more enriched in the liver and in the  
264 stomach mucosa compared to any other tissue. Motif analysis revealed regions of  
265 active histone modification in the liver overlapping HERV15 are enriched in motifs for  
266 EOMES (Supplemental File S2). This transcription factor (TF) has a key role in the  
267 immune response in the liver, instructing the development of two distinct natural killer  
268 cell lineages specific to this tissue (Daussy et al. 2014). Moreover, EOMES is also  
269 an established tumor suppressor in Hepatocellular Carcinoma (Gao et al. 2014).

270 Similarly, X7C (LINE) and Charlie15a (DNA TE), are the most enriched TEs in  
271 the breast. We find binding sites for key breast TFs in these TEs such as KLF5 and  
272 CPEB1 (Fig. 5a; Supplemental File S2). Notably, KLF5 is an essential regulator of  
273 hormonal signaling and breast cancer development (Guo et al. 2010), and is  
274 considered a breast cancer suppressor (Chen et al. 2002). Similarly, CPEB1  
275 mediates epithelial-to-mesenchyme transition in breast, and mice depleted of this

276 gene showed increased breast cancer metastatic potential (Nagaoka et al. 2016).  
277 Interestingly Charlie15a shows tissues-specific depletion in the mononuclear blood  
278 cells (Fig. 4), highlighting its tissue specific regulatory activity.

279 Analogously, LTR13 is the most active TEs in pancreas and Lymphoblastoid Cells  
280 (LCL). These LTR copies are enriched for binding sites for SOX9 and  
281 PRDM1/Blimp-1 (Fig. 5d; Supplemental File S2). SOX9 is a master regulator of the  
282 pancreatic program (Furuyama et al. 2010), while PRDM1/Blimp-1 has a central role  
283 in determining and shaping the secretory arm of mature B Lymphocyte differentiation  
284 (Cattoretti et al. 2005).

285 We next tested whether the co-option of these tissue specifically enriched TEs  
286 (Fig. 4, 5a–f) affected the expression of the associated genes. Specifically, we  
287 tested the TE families showing the highest degree of tissue specific enrichment (Fig.  
288 4: HERV15/liver, LTR13/LCL, X7C-Charlie15a/breast). With the exception of  
289 HERV15/liver (Wilcoxon's Rank Sum Test  $p > 0.05$ ), in the other tested instances  
290 (LTR13/LCL; X7C-Charlie15a/breast) the genes associated with tissue specific TEs  
291 are significantly more highly expressed in the tissue in which they are actively  
292 enriched compared to all the other tissues (Wilcoxon's Rank Sum Test  $p < 2.2 \times 10^{-16}$ ;  
293 Figs. 5b,e). These findings support a key regulatory role for the co-opted TEs.

294 To better understand how these tissue specific TEs regulate gene expression,  
295 we investigated what typology of genomic region they overlap (i.e. promoter,  
296 intergenic, gene body). Both X7C/Charlie15a in breast and LTR13 in LCLs are  
297 significantly depleted in promoter and intergenic regions, but overrepresented in  
298 gene bodies (Figs. 5c, f), 97.8% (X7C/Charlie15a) and 96.4% (LTR13) of them  
299 respectively found in introns.

300 The Roadmap data did not include H3K27ac profiles for all tissues. Therefore,  
301 to further characterize these intronic regions, we used publicly available H3K27ac  
302 and H3K4me1 Encode data generated from the breast epithelium and from the  
303 MCF7 cell line (The Encode Project Consortium 2012). These data reveal that  
304 53.0% of the intronic regions containing X7C or Charlie15a are found within 1 Kb of  
305 a H3K27ac or H3K4me1 peak, thus suggesting that most of these regions likely  
306 represent breast intronic enhancers. As comparison, only 33.7% of random intronic  
307 regions of the same size and number of the ones overlapping X7C/Charlie15a TEs  
308 are found within 1 kb of a H3K27ac or H3K4me1 peak (Fisher's Exact Test  $p < 2.2 \times$   
309  $10^{-16}$ ).

310 Collectively, these findings point towards a model in which specific TE  
311 families, largely belonging to LTR (ERVs) and DNA TE classes, have more  
312 regulatory potential than other transposons. Furthermore, our data expand upon  
313 previous findings that ERVs that escape repression can have a significant impact on  
314 the host gene regulation (Wang et al. 2005; Cohen et al. 2009; Jacques et al. 2013;  
315 Chuong et al. 2016; Janoušek et al 2016; Trizzino et al. 2017).

316

### 317 **SVAs exhibit tissue specific regulatory activity**

318 In our recent work, we demonstrated that a large fraction of human specific cis-  
319 regulatory elements in the liver are SVA transposons, which typically function as  
320 transcriptional repressors, at least in this tissue (Trizzino et al. 2017). SVAs are very  
321 young transposons, being Hominidae (SVA\_A, B, C and D) and human specific  
322 (SVA\_E and F).

323 According to Roadmap data, SVAs are enriched in the active regions of 13/25  
324 tissues (Fig. 1b), and mainly corresponded to SVA\_A copies (Supplementary Table

325 S4). We first assessed the contribution of SVAs to gene regulation of two of these  
326 tissues: the adipose nuclei and the liver. We chose the liver because of the previous  
327 evidence of SVA enrichment in hepatic regulatory regions (Trizzino et al. 2017), and  
328 the adipose nuclei as a “control tissue” since it is involved in most of the metabolic  
329 pathways that also involve the hepatocytes.

330 In both tissues, SVAs provide binding sites for key transcription factors (Fig.  
331 5g, j; Supplemental File S2). ZEB1 is the master regulator of adipogenesis (Saykally  
332 et al. 2009; Gubelmann et al. 2014), and, based on GTEx data, is ten times more  
333 highly expressed in adipose tissue compared to the liver. Similarly, SOX6  
334 contributes to the developmental origin of obesity by promoting adipogenesis, and  
335 has a key role in adipocyte differentiation (Leow et al. 2016). Consistent with the  
336 data reported for other tissues, active SVAs associated with adipose nuclei and liver  
337 are strongly enriched in gene bodies (Figs. 5i, l). Genes associated with SVAs in the  
338 adipose nuclei are significantly more highly expressed in this tissue compared to  
339 other tissues (Wilcoxon’s Rank Sum Test  $p = 0.0002$ ; Fig. 5h), suggesting that SVA  
340 elements can work as transcriptional activators, at least in the adipose tissue.

341 In the liver, SVAs in active regions are enriched for hepatic regulators like  
342 CPEB1, that mediates insulin signaling in the liver (Fig. 5j; Alexandrov et al. 2012),  
343 and STAT3, that regulates liver regeneration and immune response and negatively  
344 modulates insulin action (Fig. 5j; He et al. 2011). However, the liver SVAs are also  
345 enriched for established transcriptional repressors, like Smad3 (Fig. 5j). Consistently,  
346 genes associated with liver active SVAs exhibit lower expression in this tissue  
347 compared to all the others (Wilcoxon’s Rank Sum Test  $p < 2.2 \times 10^{-16}$ ; Fig. 5k),  
348 supporting the previously proposed repressive role of SVAs in the hepatic system  
349 (Trizzino et al. 2017).

350

351

## 352 **Discussion**

353 The contribution of transposable elements (TEs) to gene regulation was proposed  
354 over half a century ago (McClintock 1950, 1984; Britten and Davidson 1969, 1979)  
355 and considerably expanded over the last two decades, largely due to the advances  
356 in next generation sequencing (Jordan et al. 2003; Bejerano et al. 2006; Wang et al.  
357 2007; Bourque et al. 2008; Sasaki et al. 2008; Markljung et al. 2009; Kunarso et al.  
358 2010; Lynch et al. 2011, 2015; Schmidt et al. 2012; Chuong et al. 2013, 2016;  
359 Jacques et al. 2013; Xie et al. 2013; del Rosario et al. 2014; Sundaram et al. 2014;  
360 Du et al. 2016; Rayan et al. 2016; Simonti et al. 2017; Trizzino et al. 2017; Ward et  
361 al. 2017).

362 In order to gain insights in this topic, we identified TEs enriched in active and  
363 repressed genomic regions of 24 human tissues, using Roadmap and GTEx data.  
364 Our analyses provide a novel integrated overview of the TE contribution to the  
365 human gene regulation across multiple tissues, also correlating the presence of TE  
366 copies to tissue specific gene expression. In fact, many of the previous studies have  
367 proposed that TEs are frequently enriched in cis-regulatory elements and lncRNAs  
368 (Lynch et al. 2011, 2015; Kelley et al. 2012; Kapusta et al. 2013; Trizzino et al.  
369 2017), but the actual effect of the presence of TEs on the associated gene  
370 expression was not tested on a large scale. Recent work has evaluated the  
371 prevalence of TE-derived DNA in enhancers and promoters across mouse cell lines  
372 and primary tissues (Simonti et al. 2017). The present study builds upon this by  
373 investigating the effects of TE recruitment on tissue-specific gene expression and

374 characterizing the mechanisms of TE co-option by performing tissue-specific motif  
375 analyses.

376 We demonstrate that ~10% of the TEs identified in the human genome are  
377 significantly enriched in active regions (promoters, intergenic enhancers, gene  
378 bodies) of 24 different human tissues. In general, we report a high degree of  
379 variability in the co-option and repression of different TE families across tissues, and  
380 detect multiple instances of TEs displaying tissue specific regulatory function.

381 We show that DNA TEs are generally enriched in active regions, suggesting a high  
382 regulatory potential for these elements (i.e. high potential of providing binding sites  
383 for transcription factors), likely a main factor driving TE co-option (Chuong et al.  
384 2016). These copies regulate gene expression in a tissue specific fashion, mainly  
385 functioning as substrate for the binding of key, tissue specific, master regulators.

386 Co-opted TEs are typically distributed along gene bodies, likely functioning as  
387 intronic enhancers. We reason that this may be explained by the assumption that  
388 TEs located within intra-genic regions are less likely to be repressed or removed. .

389 In agreement with these findings, a recent study has shown that TEs are depleted in  
390 human promoters and intergenic enhancers across multiple tissues (Simonti et al.  
391 2017). In this context, we see a correlation between gene expression variance and  
392 the insertion of TEs in their loci or regulatory regions. This may suggest that genes  
393 consistently expressed across tissues are less prone towards TE co-option, but

394 future analyses in this direction will be needed to further characterize this  
395 phenomenon. On the other hand, L1 LINEs and ERV LTRs are the most frequently  
396 enriched TE classes in the repressed regions. L1 retrotransposons are among the  
397 most active TEs in the human genome (Beck et al. 2010), and several studies have  
398 demonstrated that they are also active in brain tissues (e.g. hippocampus), and can

399 contribute to neuronal genetic diversity in mammals (Muotri et al. 2005; Coufal et al.  
400 2009; Sur et al. 2017; Upton et al 2017). Both L1s and LTRs possess their own  
401 regulatory architecture, and we speculate that their preferential silencing prevents  
402 these TEs from interfering with gene regulatory networks. Despite this, we  
403 demonstrate that LTRs that escape repression may be co-opted in a tissue specific  
404 manner in the active regulatory regions, putatively as a consequence of their  
405 regulatory potential.

406 In agreement with recent reports (Walter et al. 2016; Ward et al. 2017),  
407 different TE classes are preferentially silenced through different modalities: LTRs,  
408 LINEs, and SVAs are preferentially repressed via heterochromatin conformation,  
409 while SINEs and DNA TEs are predominant among the TEs silenced by the  
410 Polycomb Repressive Complex. We show that TEs enriched in repressed regions  
411 of most tissues are generally young, while TEs enriched in active regions of most  
412 tissues generally predate the split of eutherian mammals. This is consistent with an  
413 accumulation of mutations in these ancient copies that would have increased the  
414 likelihood to generate binding sites for transcription factors, and thus the probability  
415 for the TE to be co-opted in the regulatory networks.

416 Finally, we demonstrate that SVAs, previously characterized as transcriptional  
417 repressors in select cell-types (Savage et al. 2014; Trizzino et al. 2017), can act as  
418 both activators or repressors in a tissue specific fashion.

419

## 420 **Conclusions**

421 In summary, we present a comprehensive overview of the contribution of TE copies  
422 to human gene regulation: not only do they provide an important source of



423 evolutionary novelty for the genome, but they can also function with tissue specific  
424 patterns, modulating the expression of key genes and pathways.

425

## 426 **Methods**

### 427 **TE-Analysis pipeline**

428 To test for TE enrichment in active and repressed regions, we used the TEanalysis  
429 pipeline v 4.6 (Kapusta et al. 2013; <https://github.com/4ureliek/TEanalysis>). This  
430 pipeline is designed to output the TE composition of given features, such as TE  
431 counts and TE amounts, aiming to detect potential TE enrichments in the select  
432 features. Roadmap annotated bed files for each of the 24 tissues were downloaded (  
433 [http://egg2.wustl.edu/roadmap/data/byFileType/chromhmmSegmentations/ChmmMo  
434 dels/coreMarks/jointModel/final/](http://egg2.wustl.edu/roadmap/data/byFileType/chromhmmSegmentations/ChmmModels/coreMarks/jointModel/final/); last access: 10/4/2017). One file per tissue was  
435 downloaded (TISSUE\_ID\_coreMarks\_dense.bed.gz"; Supplementary Table S1).  
436 From each of the 24 bedfiles, we produced two files: one for the active regions  
437 (Roadmap annotations: "TssA", "TssAFlnk", "TxFlnk", "Tx", "TxWk", "EnhG",  
438 "Enh", "TssBiv", "EnhBiv"), and one for the repressed regions (Roadmap  
439 annotations: "Het", "ReprPC", "ReprPCWk").

440 For each tissue, we tested for TE enrichment in the "active" and "repressed"  
441 bed files using the "TE-analysis\_Shuffle\_bed.pl" script v 4.3. Specifically, this script  
442 assesses which TEs are significantly enriched in a set of features (bed files) by  
443 comparing observed overlaps with the average of  $N$  expected overlaps (here 1000).  
444 These expected overlaps were obtained by shuffling the genomic position of TEs. TE  
445 annotations were downloaded from the University of California Santa Cruz Genome  
446 Browser (RepeatMasker, Hg19 version; Smit et al. 2015–2013).

447 The “TE-analysis\_Shuffle\_bed.pl” script was run with Bedtools v2.27.1 (Quinlan and  
448 Hall 2010) and the following parameters:

449 -f Roadmap\_BEDFILE (active or repressed)

450 -q RepeatMasker.out (TE file, hg19)

451 -n 1000 (number of bootstrap replicates)

452 -r hg19.chrom.sizes

453 -g 20141105\_hg38\_TEage\_with-nonTE.txt (distributed with the pipeline)

454 -s rm (shuffles the TEs within their genomics position)

455

456 The script performs a two-tailed permutation test to assess the enrichment (or  
457 depletion) of each annotated TE in the given regions (Roadmap regions), thus  
458 assigning a *p-value* to each annotated TE. Additionally, we corrected for multiple  
459 testing by applying a False Discovery Rate (FDR; Benjamini-Hochberg; Benjamini  
460 and Hochberg 1995). Only TEs with FDR < 5% were retained, considered  
461 significantly enriched in the given tissue, and used for downstream analyses.

462

### 463 **Composition of enriched TEs**

464 To characterize TEs enriched within active and repressed regions of each tissue  
465 (e.g. Figs. 1b, 2b), each TE was assigned to one of the major TE classes: DNA  
466 transposons, LINEs, LTRs, SINEs, SVAs, according to RepeatMasker annotations.  
467 To assess the genomic composition of the enriched TEs (e.g. Figs. 1c, 2c), we  
468 considered as: 1) PROMOTERS all of the regions annotated as “TssA” (H3K4me3),  
469 “TssAFlnk” (H3K4me3 + H3K4me1), or “TssBiv” (H3K4me3 + H3K27me3); 2)  
470 INTERGENIC ENHANCERS: all of the regions annotated as “Enh” (H3K4me1) or  
471 “EnhBiv” (H3K4me1 + H3K27me3); 3) GENE BODIES: all of the regions annotated

472 as "EnhG" (H3K4me1 + H3K36me3), "Tx" (strong H3K36me3), or "TxWk" (weak  
473 H3K36me3).

474

#### 475 **Correlation between TE insertion and variance in gene expression**

476 We calculated the variance and mean of the TPM (Transcripts Per Million) for each  
477 gene using GTEx data. We assigned each TE overlapping an active or a repressed  
478 region to the closest gene, based on the distance to the closest transcription start  
479 site. Next, we divided all human genes in four categories: 1) Genes associated with  
480 TEs that are only found in active regions across tissues; 2) Genes associated with  
481 TEs that are found in active or repressed regions in a tissue specific fashion; 3)  
482 Genes associated with TEs that are only found in repressed regions; 4) Genes never  
483 associated with TE insertions. Gene expression variance, normalized by mean  
484 expression, was compared across the four categories.

485

#### 486 **Computation of Z-scores for tissue specificity**

487 For each TE enriched in active regions (FDR < 5%), we used the Odd Ratios (OR)  
488 from the permutation test of the TE-Analysis pipeline to compute Z-scores with the  
489 following equation:  $(OR - \text{mean}(OR)) / \text{sd}(OR)$ . Z-scores can be found in  
490 Supplemental Table S5.

491

#### 492 **Motif analyses**

493 Motif analyses were performed using the Meme-Suite (Bailey et al. 2009), and  
494 specifically with the Meme-ChIP application. Fasta files of the regions of interest  
495 were produced using BEDTools v2.27.1. Shuffled input sequences were used as

496 background. *E-values* < 0.001 were used as threshold for significance (Bailey et al.  
497 2009).

498

### 499 **Effect of TE co-option on gene expression**

500 For each human gene and for each tissue, GTEx provides the mean of the TPMs  
501 (Transcripts Per Million). For each gene associated with a TE of interest (e.g. TEs  
502 with tissue specific activity, or TEs associated with an SVA), we used the mean  
503 TPMs to compare the expression of genes in the tissue of enrichment Vs the  
504 average of the gene expression of the same genes in all the other considered  
505 tissues (i.e. mean of TPMs across all the other tissues).

506

### 507 **Statistical and genomic analyses**

508 All statistical analyses were performed using R v3.4.1 (R Core Team 2016). Figures  
509 were made with the package ggplot2 (Wickham 2009). BEDTools v2.27.1 was used  
510 for all the genomic analyses.

511

### 512 **Acknowledgements**

513 We thank Roadmap and GTEx Consortia for the generation of invaluable data. MT  
514 thanks his current P.I. (Alessandro Gardini, The Wistar Institute) who granted him  
515 time and freedom to work on this project.

516

### 517 **Authors' contributions**

518 MT and CDB designed the project. MT, AK, and CDB analyzed the data. MT, AK,  
519 and CDB wrote and approved the manuscript.

520

## 521 References

- 522 1. Alexandrov IM et al. 2012. Cytoplasmic Polyadenylation Element Binding  
523 Protein Deficiency Stimulates PTEN and Stat3 mRNA Translation and  
524 Induces Hepatic Insulin Resistance. *Plos Genet.* 8(1):e1002457.
- 525 2. Bailey TL, et al. 2009. MEME SUITE: tools for motif discovery and searching.  
526 *Nucleic Acids Res.* 37:W202–08.
- 527 3. Batzer MA, Deininger PL. 1991. A human-specific subfamily of Alu  
528 sequences. *Genomics.* 9:481-7.
- 529 4. Batzer MA, Gudi VA, Mena JC, Foltz DW, Herrera RJ, Deininger PL. 1991.  
530 Amplification dynamics of human-specific (HS) Alu family members. *Nucleic*  
531 *Acids Res.* 19:3619–23.
- 532 5. Beck, CM et al. 2010. LINE-1 Retrotransposition Activity in Human Genomes.  
533 *Cell.*
- 534 6. 2010;141:1159–70.
- 535 7. Bejerano G, Lowe CB, Ahituv N, King B, Siepel A, Salama SR, Rubin EM,  
536 James Kent W, Haussler D. 2006. A distal enhancer and an ultraconserved  
537 exon are derived from a novel retroposon. *Nature.* 441:87–90.
- 538 8. Bourque G, Leong B, Vega VB, Chen X, Lee YL, Srinivasan KG, Chew J-L,  
539 Ruan Y, Wei C-L, Ng HH, et al. 2008. Evolution of the mammalian  
540 transcription factor binding
- 541 repertoire via transposable elements. *Genome Res.* 18:1752–62.
- 542 10. Britten RJ, Davidson EH. 1969. Gene regulation for higher cells: a theory.  
543 *Science.*
- 544 11. 165:349–57.
- 545 12. Brouha B, Schustak J, Badge RM, Lutz-Prigge S, Farley AH, Moran JV,  
546 Kazazian HH. 2003. Hot L1s account for the bulk of retrotransposition in the  
547 human population. *Proc Natl Acad Sci USA.* 100:5280–5.
- 548 13. Cattoretti G, Angelin-Duclos C, Shaknovich R, Zhou H, Wang D, Alobeid B.  
549 2005. PRDM1/Blimp-1 is expressed in human B-lymphocytes committed to  
550 the plasma cell lineage. *J Pathol.* 206:76–86.
- 551 14. Chen C, Bhalala HV, Qiao H, Dong JT. 2002. A possible tumor suppressor  
552 role of the KLF5 transcription factor in human breast cancer. *Oncogene.*  
553 21:6567–6572.
- 554 15. Chuong EB, Elde NC, Feschotte C. 2016. Regulatory evolution of innate  
555 immunity through co-option of endogenous retroviruses. *Science.* 351:1083–  
556 7.
- 557 16. Chuong EB, Rumi MAK, Soares MJ, Baker JC. 2013. Endogenous  
558 retroviruses function as species-specific enhancer elements in the placenta.  
559 *Nat Genet.* 45:325–9.
- 560 17. Cohen CJ, Lock WM, Mager DL. 2009. Endogenous retroviral LTRs as  
561 promoters for human genes: a critical assessment. *Gene.* 448:105–14.
- 562 18. Coufal NG, Garcia-Perez JL, Peng GE, Yeo GW, Mu Y, Lovci MT, Morell M,  
563 O'Shea KS, Moran JV, Gage FH. 2009. L1 retrotransposition in human neural  
564 progenitor cells. *Nature.* 460(7259):1127–31.
- 565 19. Daussy C, et al. 2014. T-bet and Eomes instruct the development of two  
566 distinct natural killer cell lineages in the liver and in the bone marrow. *J Exp*  
567 *Med.* 3:563–77.
- 568 20. Davidson EH, Britten RJ. 1979. Regulation of gene expression: possible role  
569 of repetitive sequences. *Science.* 1979;204:1052–9.

- 570 21. del Rosario RCH, Rayan NA, Prabhakar S. 2014. Noncoding origins of  
571 anthropoid traits and a new null model of transposon functionalization.  
572 *Genome Res.* 24:1469–84.
- 573 22. Du J, Leung A, Trac C, Lee M, Parks BW, Lusic AJ, Natarajan R, Schones  
574 DE. 2016. Chromatin variation associated with liver metabolism is mediated  
575 by transposable  
576 elements. *Epigenetics Chromatin.* 9:28.
- 577 24. Fuchs NV, Loewer S, Daley GQ, Izsvak Z, Lower J, Lower R. 2013. Human  
578 endogenous retrovirus K (HML-2) RNA and protein expression is a marker for  
579 human embryonic and induced pluripotent stem cells. *Retrovirology*;10:115.
- 580 25. Furuyama K, et al. 2010. Continuous cell supply from a Sox9-expressing  
581 progenitor  
582 zone in adult liver, exocrine pancreas and intestine. *Nature Genetics.*  
583 43(1):35–42.
- 584 27. Gao F, et al. 2014. Integrated analyses of DNA methylation and  
585 hydroxymethylation reveal tumor suppressive roles of ECM1, ATF5, and  
586 EOMES in human hepatocellular carcinoma. *Genome Biol.* 15:533–46.
- 587 28. GTEx Consortium. 2017. Genetic effects on gene expression across human  
588 tissues. *Nature.* 550:204–13.
- 589 29. Gubelmann C, et al. 2014. Identification of the transcription factor ZEB1 as a  
590 central  
591 component of the adipogenic gene regulatory network. *eLIFE.* 3:e03346.
- 592 31. Guo P, Dong X-Y, Zhao KW, Sun X, Li Q, Dong J-T. 2010. Estrogen-induced  
593 interaction between KLF5 and estrogen receptor (ER) suppresses the function  
594 of ER in ER-positive breast cancer cells. *Int J Cancer.* 126(1):81–9.
- 595 32. He G, Karin M. 2011. NF- $\kappa$ B and STAT3 – key players in liver inflammation  
596 and cancer. *Cell Res.* 21:159-68.
- 597 33. Jacques PE, Jeyakani J, Bourque G. 2013. The majority of primate-specific  
598 regulatory sequences are derived from transposable elements. *PLoS Genet* 9:  
599 e1003504.
- 600 34. Janoušek V, Laukaitis CM, Yanchukov A, Karn R. 2016. The role of  
601 retrotransposons in gene family expansions in the human and mouse  
602 genomes. *Genome Biol Evol.*  
603 8:2632–50.
- 604 36. Jordan IK, Rogozin IB, Glazko GV, Koonin EV. 2003. Origin of a substantial  
605 fraction of human regulatory sequences from transposable elements. *Trends*  
606 *Genet.* 19:68–72.
- 607 37. Kapusta A, Kronenberg Z, Lynch VJ, Zhuo X, Ramsay L, Bourque G, Yandell  
608 M, Feschotte C. 2013. Transposable elements are major contributors to the  
609 origin, diversification, and regulation of vertebrate long noncoding RNAs.  
610 *PLoS Genet.* 9:e1003470.
- 611 38. Kazazian HH, Wong C, Youssoufian H, Scott AF, Phillips DG, Antonarakis  
612 SE. 1988. Haemophilia A resulting from de novo insertion of L1 sequences  
613 represents a novel mechanism for mutation in man. *Nature.* 332:164–6.
- 614 39. Kelley D, Rinn J. 2012. Transposable elements reveal a stem cell-specific  
615 class of long noncoding RNAs. 13(11):R107.
- 616 40. Klaver B, Berkhout B. 1994. Comparison of 5' and 3' long terminal repeat  
617 promoter function in human immunodeficiency virus. *J Virol.* 68(6):3830–40.

- 618 41. Kunarso G, Chia NY, Jeyakani J, Hwang C, Lu X, Chan YS, Ng HH, Bourque  
619 G. 2010. Transposable elements have rewired the core regulatory network of  
620 human embryonic stem cells. *Nat Genet.* 42:631–4.
- 621 42. Lavie L, Esther Maldener E, Brook Brouha B, Meese EU, Mayer J. 2004. The  
622 human L1 promoter: Variable transcription initiation sites and a major impact  
623 of upstream flanking sequence on promoter activity. *Genome Res.* 14:2253–  
624 60.
- 625 43. Leow SC, et al. 2016. The transcription factor SOX6 contributes to the  
626 developmental origins of obesity by promoting adipogenesis. *Development.*  
627 143:950–61.
- 628 44. Lynch VJ, Leclerc RD, May G, Wagner GP. 2011. Transposon-mediated  
629 rewiring of gene regulatory networks contributed to the evolution of pregnancy  
630 in mammals. *Nat*  
631 *Genet.* 43:1154–9.
- 632 46. Lynch VJ, Nnamani MC, Kapusta A, Brayer K, Plaza SL, Mazur EC, Emera D,  
633 Sheikh SZ, Grützner F, Bauersachs S, et al. 2015. Ancient transposable  
634 elements transformed the uterine regulatory landscape and transcriptome  
635 during the evolution of mammalian pregnancy. *Cell Rep.* 10:551–61.
- 636 47. Macfarlan TS, et al. 2012. Embryonic stem cell potency fluctuates with  
637 endogenous retrovirus activity. *Nature.* 487:57–63.
- 638 48. Markljung E, Jiang L, Jaffe JD, Mikkelsen TS, Wallerman O, Larhammar M,  
639 Zhang X, Wang L, Saenz-Vash V, Gnirke A, et al. 2009. ZBED6, a novel  
640 transcription factor derived from a domesticated DNA transposon regulates  
641 IGF2 expression and muscle growth. *PLoS Biol.* 7:e1000256.
- 642 49. McClintock B. 1950. The origin and behavior of mutable loci in maize. *Proc*  
643 *Natl Acad Sci USA.* 36:344–55.
- 644 50. McClintock B. 1984. The significance of responses of the genome to  
645 challenge. *Science.* 226:792–801.
- 646 51. Medstrand P, Mager DL. 1998. Human-specific integrations of the HERV-K  
647 endogenous retrovirus family. *J Virol.* 72:9782–7.
- 648 52. Muotri AR, Chu VT, Marchetto MC, Deng W, Moran JV, Gage FH. 2005.  
649 Somatic mosaicism in neuronal precursor cells mediated by L1  
650 retrotransposition. *Nature.*  
651 435(7044):903–10.
- 652 54. Nagaoka K, Fujii K, Zhang H, Usuda K, Watanabe G, Ivshina M, Richter JD.  
653 2016. CPEB1 mediates epithelial-to-mesenchyme transition and breast  
654 cancer metastasis. *Oncogene.* 35:2893–901.
- 655 55. Ostertag EM, Goodier JL, Zhang Y, Kazazian HH. 2003. SVA elements are  
656 non autonomous retrotransposons that cause disease in humans. *Am J Hum*  
657 *Genet.* 73:1444–51.
- 658 56. Pavlicev M, Hiratsuka K, Swaggart KA, Dunn C, and Muglia L. 2015.  
659 Detecting Endogenous Retrovirus-Driven tissue specific Gene Transcription.  
660 *Genome Biol Evol.* 7(4):1082–97
- 661 57. Quinlan AR, Hall IM. 2010. BEDTools: a flexible suite of utilities for comparing  
662 genomic features. *Bioinformatics.* 26:841–2.
- 663 58. R Core Team. 2016. R: a language and environment for statistical computing.  
664 R Foundation for Statistical Computing, Vienna, Austria. 2016. [https://www.R-](https://www.R-project.org/)  
665 [project.org/](https://www.R-project.org/).

- 666 59. Rayan NA, Del Rosario RCH, Prabhakar S. 2016. Massive contribution of  
667 transposable elements to mammalian regulatory sequences. *Semin Cell Dev*  
668 *Biol.* 57:51–6.
- 669 60. Roadmap Epigenomics Mapping Consortium. 2015. Integrative analysis of  
670 111 reference human epigenomes. *Nature.* 518:317–30.
- 671 61. Sasaki T, Nishihara H, Hirakawa M, Fujimura K, Tanaka M, Kokubo N,  
672 Kimura-Yoshida C, Matsuo I, Sumiyama K, Saitou N, et al. Possible  
673 involvement of SINEs in mammalian-specific brain formation. 2008. *Proc Natl*  
674 *Acad Sci USA.* 105: 4220–5.
- 675 62. Savage AL, et al. 2014. An evaluation of a SVA retrotransposon in the FUS  
676 promoter as a transcriptional regulator and its association to ALS. *Plos One.*  
677 9(6):e90833.
- 678 63. Saykally JN, Dogan S, Cleary MP, Sanders MM. 2009. The ZEB1  
679 Transcription Factor Is a Novel Repressor of Adiposity in Female Mice.  
680 *PlosONE.* 4(12):e8460.
- 681 64. Schmidt D, Schwalie PC, Wilson MD, Ballester B, Gonçalves Â, Kutter C,  
682 Brown GD,
- 683 65. Marshall A, Flicek P, Odom DT. 2012. Waves of retrotransposon expansion  
684 remodel
- 685 66. genome organization and CTCF binding in multiple mammalian lineages. *Cell.*  
686 67. 148:335–48.
- 687 68. Simonti CN, Pavlicev M, Capra JA. 2017. Transposable Element Exaptation  
688 into Regulatory Regions is Rare, Influenced by Evolutionary Age, and Subject  
689 to Pleiotropic Constraints. *Mol Biol Evol.* 34(11):2856–69.
- 690 69. Smit A, Hubley R, Green P. 2013–2015. RepeatMasker Open 4.0. [http://](http://www.repeatmasker.org)  
691 [www.repeatmasker.org](http://www.repeatmasker.org).
- 692 70. Benjamini Y, Hochberg Y. 1995. Controlling the false discovery rate: a  
693 practical and powerful approach to multiple testing. *J R Stat Soc B.* 57:289–  
694 300.
- 695 71. Sundaram V, Cheng Y, Ma Z, Li D, Xing X, Edge P, Snyder MP, Wang T.  
696 2014. Widespread contribution of transposable elements to the innovation of  
697 gene regulatory networks. *Genome Res.* 24:1963–76.
- 698 72. Sur D, et al. 2017. Detection of the LINE-1 retrotransposon RNA-binding  
699 protein ORF1p in different anatomical regions of the human brain. *Mobile*  
700 *DNA.* 8:17.
- 701 73. The ENCODE Project Consortium. 2012. An integrated encyclopedia of DNA  
702 elements in the human genome. *Nature.* 489:57–74.
- 703 74. Tonjes RR, et al. 1996. HERV-K: the biologically most active human  
704 endogenous retrovirus family. *J Acquir Immune Defic Syndr Hum Retroviro.*  
705 13(1):261–7.
- 706 75. Trizzino M, Park S, Holsbach-Beltrame M, Aracena K, Mika K, Caliskan M,  
707 Perry GH, Lynch V, Brown CD. 2017. Transposable elements are the primary  
708 source of novelty in the primate gene regulation. *Genome Res.* 27:1623–33.
- 709 76. Upton KR, et al. 2017. Ubiquitous L1 mosaicism in hippocampal neurons.  
710 *Cell.* 161:228–39.
- 711 77. Walter M, Teissandier A, Pérez-Palacios R, Burchis D. 2016. An epigenetic  
712 switch ensures transposon repression upon dynamic loss of DNA methylation  
713 in embryonic stem cells. *Elife.* 5:e11418.



- 714 79. Wang H, Xing J, Grover D, Hedges DJ, Han K, Walker JA, Batzer MA. 2005.  
715 SVA elements: a hominid-specific retroposon family. *J Mol Biol.* 354:994–  
716 1007.
- 717 80. Wang T, Zeng J, Lowe CB, Sellers RG, Salama SR, Yang M, Burgess SM,  
718 Brachmann RK, Haussler D. 2007. Species-specific endogenous retroviruses  
719 shape the transcriptional network of the human tumor suppressor protein p53.  
720 *Proc Natl Acad Sci USA.* 104:18613–8.
- 721 81. Ward M, Zhao S, Luo K, Pavlovic B, Karimi MM, Stephens M, Gilad Y. 2017.  
722 Silencing of transposable elements may not be a major driver of regulatory  
723 evolution in primate induced pluripotent stem cells. *BioRxiv.* doi:  
724 10.1101/142455.
- 725 82. Wickham H. 2009. *ggplot2: elegant graphics for data analysis.* Springer-  
726 Verlag, New York.
- 727 83. Xie M, Hong C, Zhang B, Lowdon RF, Xing X, Li D, Zhou X, Lee HJ, Maire  
728 CL, Ligon KL, et al. 2013. DNA hypomethylation within specific transposable  
729 element families associates with tissue specific enhancer landscape. *Nat*  
730 *Genet.* 45:836–41.

731

732

733

734

735

736

737

738

739

740

741

742

743

744

745

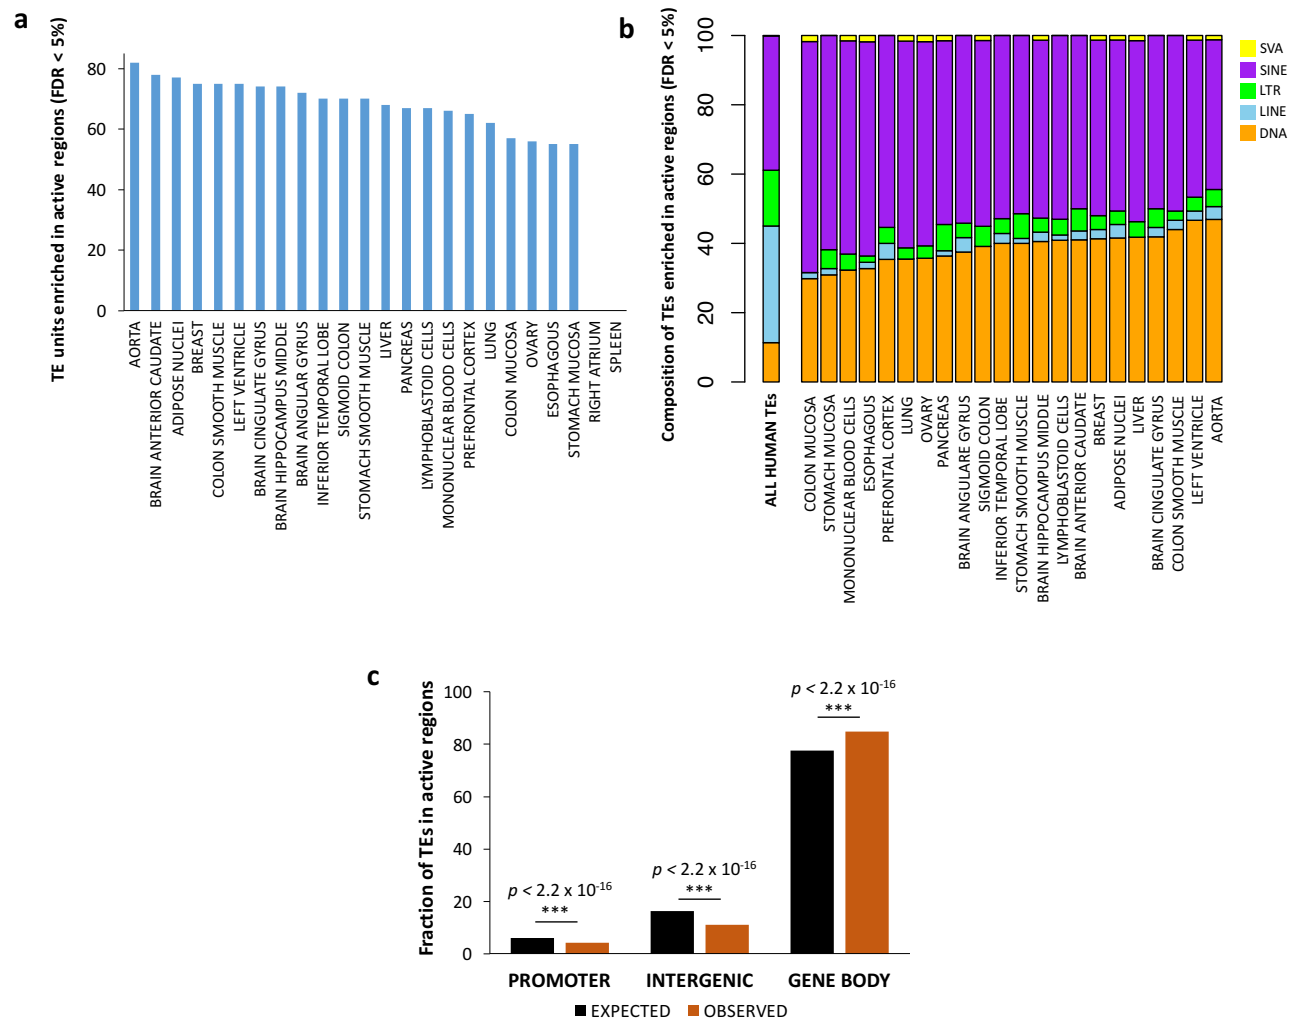

746

747 **Figure 1 - Transposable elements are enriched in active genomic regions. (A)**  
 748 The plot displays the numbers of enriched TE families in the active genomic regions  
 749 for each tissue (FDR < 5%). (B) Stacked-bar charts show TE class composition for  
 750 the transposons enriched in active regions (FDR < 5%). (C) The TEs found in active  
 751 regions are depleted from promoters and intergenic regions, while they are enriched  
 752 in gene bodies.

753

754

755

756

757

758

759

760

761

762

763

764

765

766

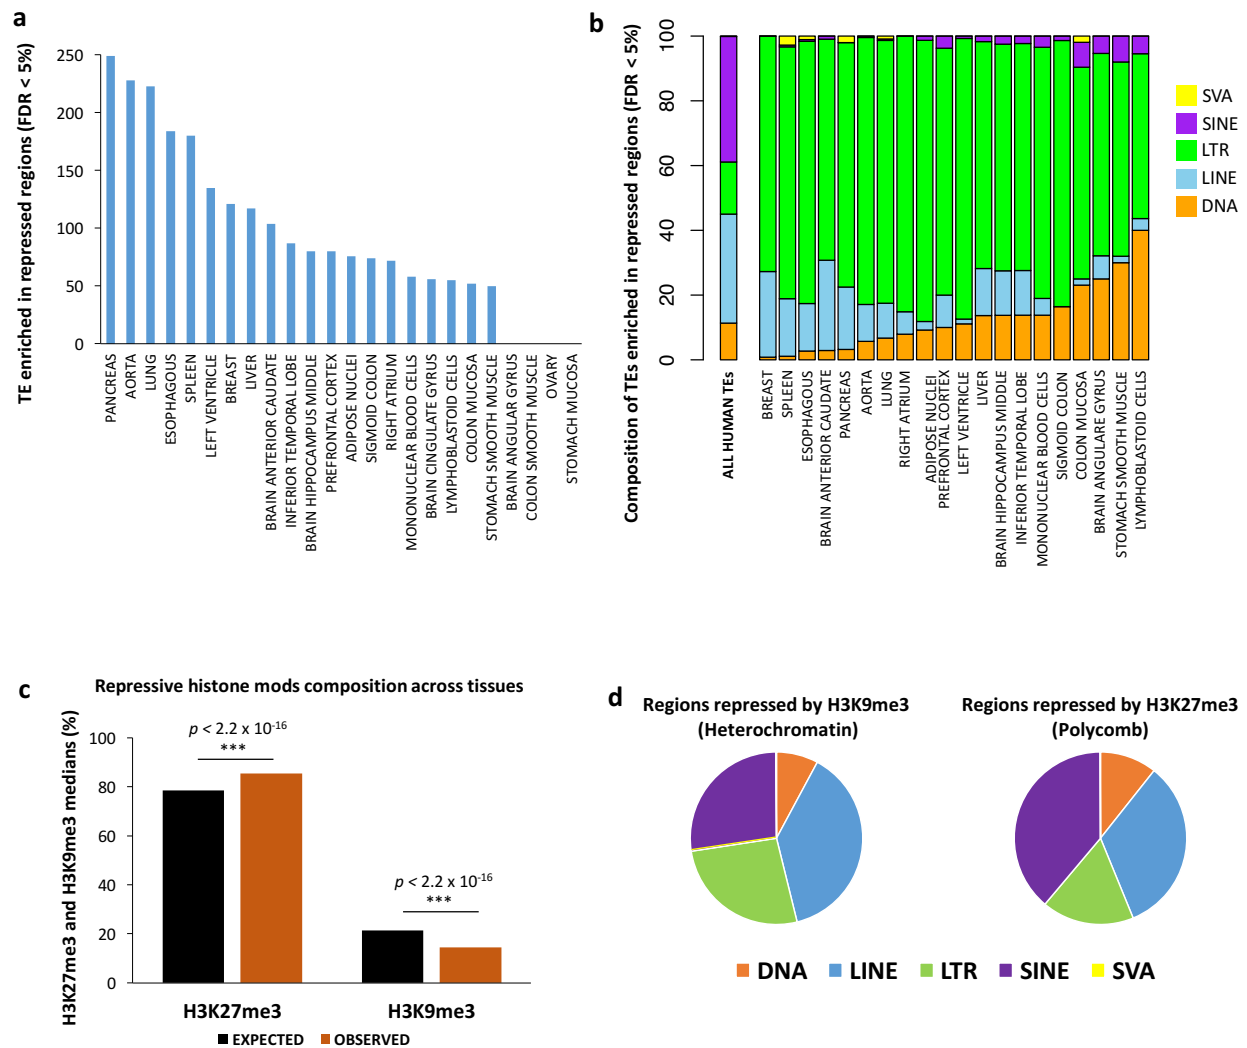

767

768

769 **Figure 2 - Transposable elements are enriched in repressed genomic regions.**

770 (A) The plot displays the numbers of enriched TE families in the repressed genomic  
 771 regions for each tissue (FDR < 5%). (B) Stacked-chart plot shows TE class  
 772 composition for the transposons enriched in repressed regions (FDR < 5%). (C)  
 773 Across tissues, the repressed TEs overlap H3K27me3 more than expected by  
 774 chance, while H3K9me3 is underrepresented. (D) Pie-charts show TE class  
 775 composition for the transposons silenced by H3K27me3 and H3K9me3.

776

777

778

779

780

781

782

783

784

785

786

787

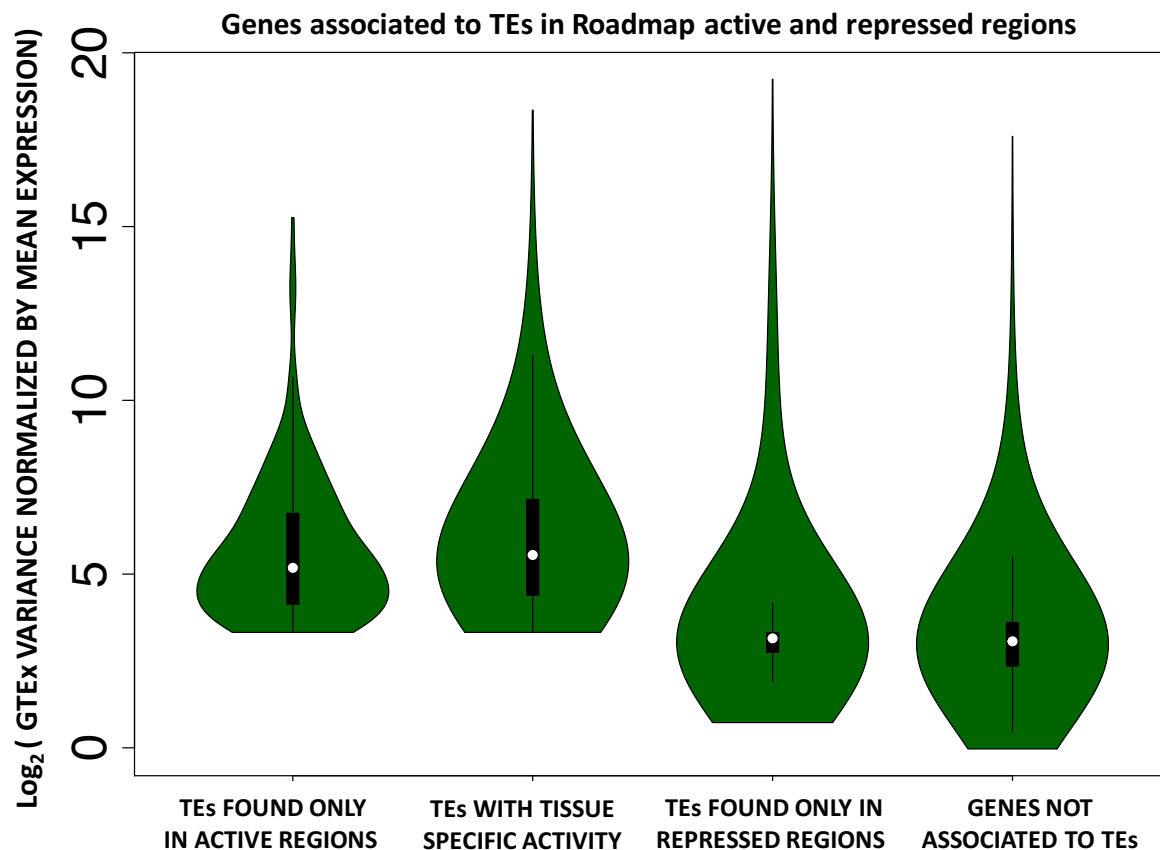

788  
789  
790  
791  
792  
793  
794  
795  
796  
797  
798  
799  
800  
801  
802  
803  
804  
805  
806  
807  
808  
809  
810  
811  
812  
813

**Figure 3 - Genes with higher expression variance are more tolerant towards TE expression.** Human genes were split into four categories: 1) Genes associated with TEs that are only found in active regions across tissues; 2) Genes associated with TEs that are found in active or repressed regions in a tissue specific fashion; 3) Genes associated with TEs that are only found in repressed regions; 4) Genes never associated with TE insertions. The violin plots display the distribution of the GTEX gene expression variance, normalized by mean expression, for each of the four categories.

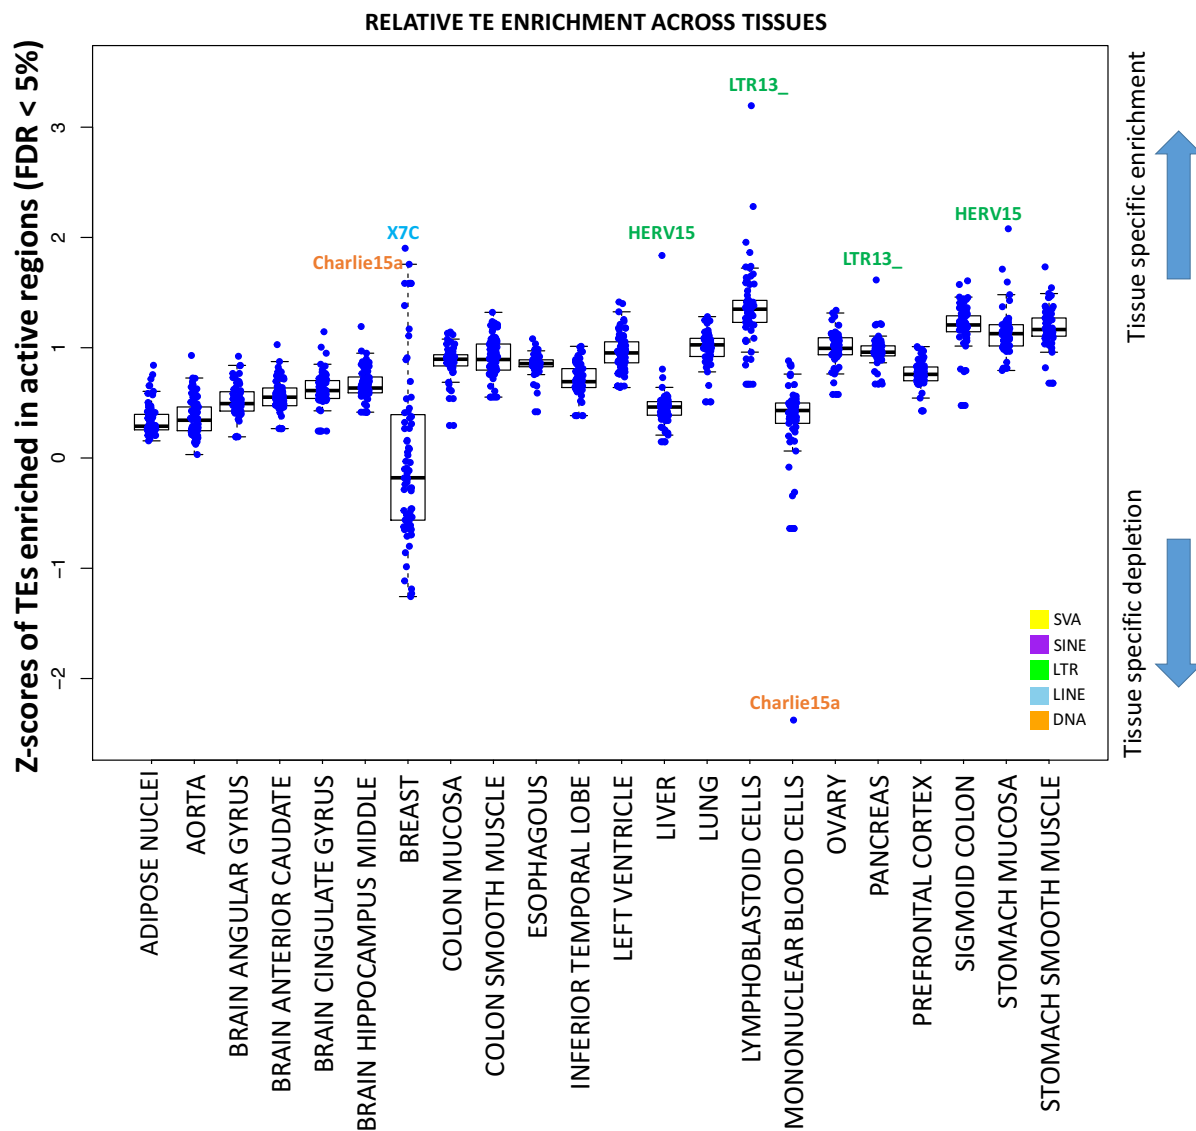

814

815

816 **Figure 4 - Transposable elements have tissue specific activity.** The plot displays  
 817 the distribution of the effect sizes (Z-scores from permutation test, see methods) for  
 818 each TE family enriched in active regions (FDR < 5%), in each tissue. The higher the  
 819 Z-score, the more tissue specific is the enrichment.

820

821

822

823

824

825

826

827

828

829

830

831

832

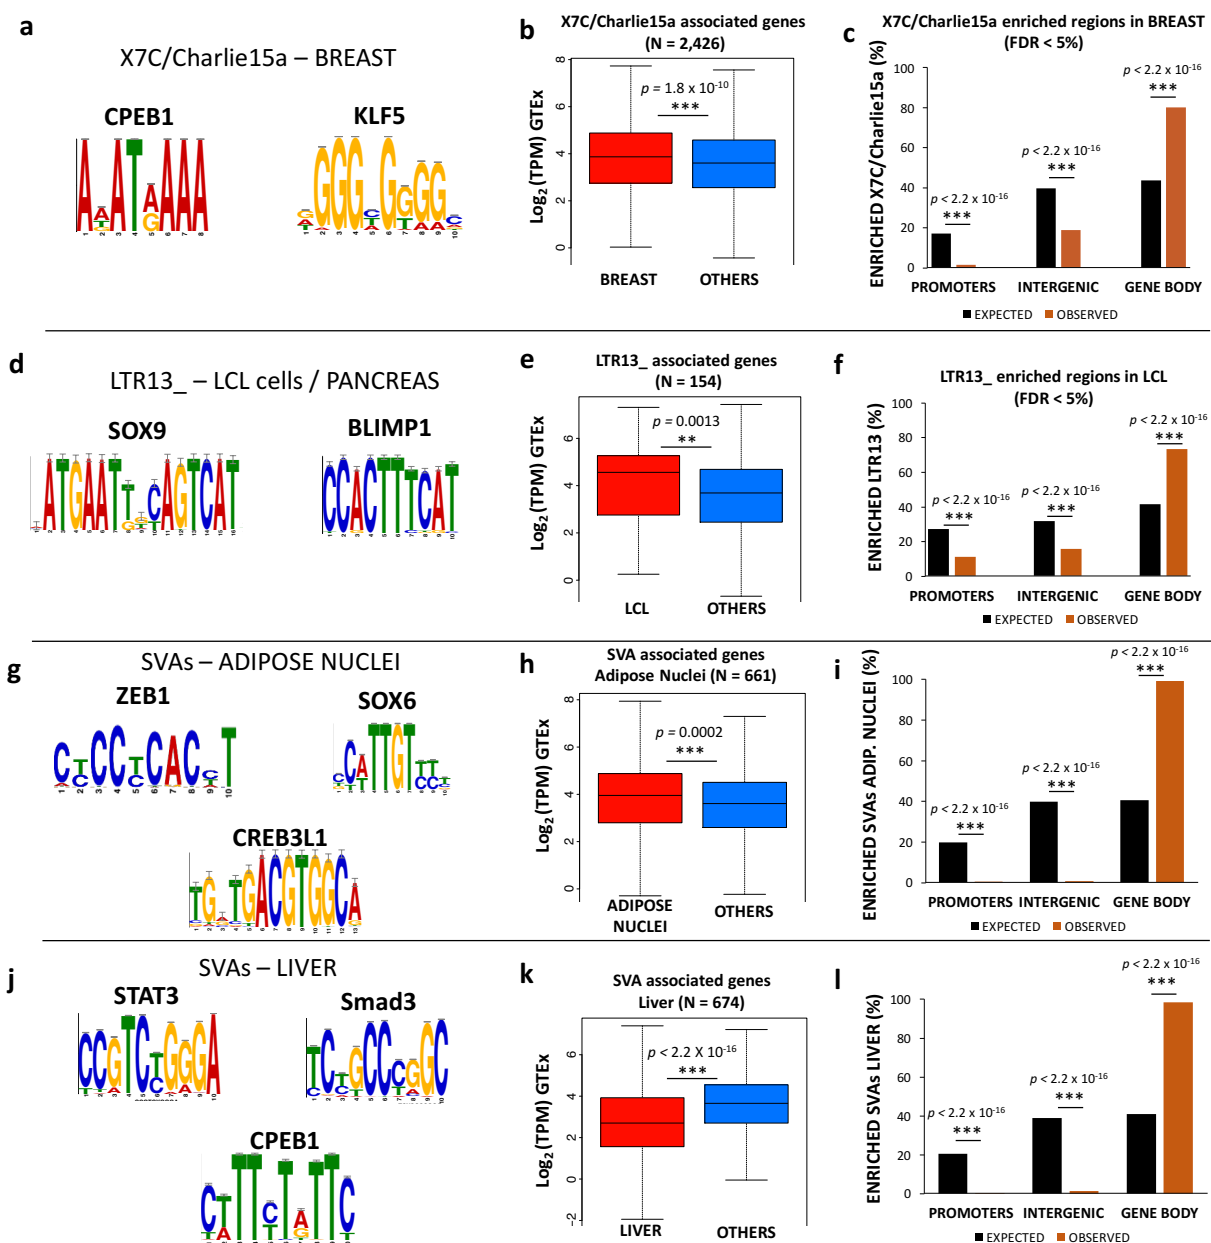

833

834

835

836

837

838

839

840

841

842

843

844

845

846

847

848

**Figure 5 - Tissue specific TEs are enriched for TF binding sites, are mostly intronic, and affect gene expression.** (a) Motifs enriched in the regions overlapping X7C and Charlie15a TEs in the breast. (b) Boxplot comparing mean expression for the genes associated to X7C and Charlie15a in the breast vs all the other tissues. (c) Genomic composition for the regions overlapping X7C and Charlie15a TEs in the breast. (d) Motifs enriched in the regions overlapping LTR13 TEs in pancreas and LCL cells (e) Boxplot comparing mean expression for the genes associated to LTR13 in the LCLs vs all the other tissues. (f) Genomic composition for the regions overlapping LTR13 in the LCLs. (g) Motifs enriched in the regions overlapping SVAs in the adipose nuclei. (h) Boxplot comparing mean expression for the genes associated to SVAs in the adipose nuclei vs all the other tissues. (i) Genomic composition for the regions overlapping SVAs in the adipose nuclei. (j) Motifs enriched in the regions overlapping SVAs in the liver (k) Boxplot comparing mean expression for the genes associated to SVAs in the liver vs all the other tissues. (l) Genomic composition for the regions overlapping SVAs in the liver.
